1 **ORIGINAL RESEARCH**

2 **Young Healthcare Workers' Employment Status and Mental Distress over**  
3 **SARS-CoV-2 in Bolivia**

4 Lea John, MSc 1,2,3,\* , Dr. María Teresa Solís-Soto, Ph.D. 3,4, Mira Mühlhäusser,  
5 MSc 3, and Prof. Dr. Katja Radon, MSc 3

6 1 Institute for Medical Information Processing, Biometry, and Epidemiology – IBE,  
7 LMU Munich, Marchioninistraße 15, 81377 Munich, Germany; lea.john@med.uni-  
8 muenchen.de

9 2 Pettenkofer School of Public Health, Elisabeth-Winterhalter-Weg 6, 81377 Munich,  
10 Germany; lea.john@med.uni-muenchen.de

11 3 Institute and Clinic for Occupational, Social and Environmental Medicine, University  
12 Hospital, LMU Munich, Ziemssenstraße 5, 80336 Munich, Germany;  
13 katja.radon@med.lmu.de

14 4 OH TARGET Competence Center, Universidad San Francisco Xavier de  
15 Chuquisaca, Calle Junín esq. Estudiantes, Casilla 212, Sucre, Bolivia;  
16 solis.teresa@usfx.bo

17 \* Correspondence: lea.john@med.uni-muenchen.de; Tel.: +49 89 4400 57610

18 **Funding Information**

19 The study was financially supported from the Center for International Health at the  
20 Ludwig-Maximilians-Universität (CIH<sup>LMU</sup>) through the German Academic Exchange  
21 Service (DAAD), within the Centers of Excellence for Exchange and Development  
22 (EXCEED) program, and the German Federal Ministry for Development and Economic

23 **NOTE:** This preprint reports new research that has not been certified by peer review and should not be used to guide clinical practice.  
Cooperation (BMZ).

24 **Competing Interests**

25 The authors have no competing interests to declare.

26 **Author Contribution**

27 MTS-S and KR conceived and designed the protocol; MTS-S, MM, and LJ collected  
28 the data; LJ, KR, and MTS-S performed the analysis. All authors read and approved  
29 the final manuscript.

30 **Key Words**

31 mental health; employment; health personnel; COVID-19; SARS-CoV-2; Bolivia; Latin  
32 America; education, medical, graduate

33

34 **Abstract**

35 *Background*

36 Healthcare workers (HCW) have been particularly affected by the SARS-CoV-2  
37 pandemic as it influenced employment conditions and unemployment/insecure  
38 employment. Their deterioration is associated with mental distress.

39 *Objective*

40 The aim of the study was to assess the trajectory of mental distress among HCW  
41 graduates during the COVID-19 pandemic in relation to their employment status.

42 *Methods*

43 We compared the change in mental distress over time among recent HCW graduates  
44 who were formally employed, to those who were unemployed/insecurely employed  
45 during the pandemic. In 2018 and 2022, we prospectively surveyed HCW who were  
46 in their final year of study in 2018 in Bolivia. Information was collected on socio-  
47 demographic characteristics, employment status, and mental distress. Mental  
48 distress was assessed using the 12-item General Health Questionnaire. Generalized  
49 Estimating Equations were implemented to examine changes in mental distress over  
50 time and the role of employment status in this development. Of the 663 HCW at  
51 baseline, 116 could be followed up.

52 *Findings*

53 Over the course of the pandemic, formal employment after graduation did not change  
54 the odds of mental distress (odds ratio (OR)=0.93 [95% confidence interval (CI)  
55 0.13–6.83]). In contrast, unemployment/insecure employment statistically significantly  
56 increased the odds of mental distress (OR=2.10 [CI 1.05–4.24]) over time.

57 *Conclusions*

58 Especially in countries with limited social support for unemployed/insecurely  
59 employed citizens, interventions and policies to prevent mental distress among newly  
60 graduated HCW are important. This is particularly relevant in the face of crises such  
61 as the COVID-19 pandemic.

62

## 63 **Introduction**

64 In January 2023, nearly three years after the Coronavirus disease 2019 (COVID-19)  
65 was declared as a global pandemic, the World Health Organization reported a  
66 cumulative number of nearly 661 million infections and 6.7 million deaths worldwide.

67 In Bolivia, with the first confirmed case on March 12, 2020, 1.2 million cases of  
68 COVID-19 have been registered, and 22,324 people have died (1). COVID-19 is  
69 caused by the severe acute respiratory syndrome coronavirus 2 (SARS-CoV-2). The  
70 disease and the measures taken to contain its spread have had a major impact on  
71 daily life around the world. Particularly in low- and middle-income regions such as  
72 Latin America, the SARS-CoV-2 outbreak has caused major economic, social,  
73 political, and health crises (2).

74 The high prevalence of SARS-CoV-2 infections worldwide, its highly infectious  
75 nature, its severe course of the disease, and the measures taken to contain its  
76 spread have contributed to the development of mental distress in the population (3,  
77 4). Mental distress is a major public health problem that reduces quality of life and  
78 increases mortality. According to a secondary analysis of the National UK Household  
79 Longitudinal Study (4) and a longitudinal study of US adults (3), mental distress  
80 increased significantly during the COVID-19 pandemic compared with pre-COVID-19  
81 data (3, 4).

82 Among healthcare workers (HCW), the collapse of the healthcare system, long  
83 working hours, constant exposure to the virus, unavailability of personal protective  
84 equipment, as well as disrespect and violence towards HCW, played a fundamental  
85 role in the deterioration of mental health during the pandemic (2). It has been shown  
86 that younger HCW, who may still be in training or have recently graduated, have an  
87 increased likelihood of developing mental distress throughout the pandemic (2, 5, 6).

88 No prospective studies, including pre-COVID-19 data from Latin America, were found  
89 to address this issue. However, a review based on cross-sectional studies from 2022  
90 concluded that the mental health of HCW worsened during the first year of the  
91 COVID-19 pandemic in Latin America (2).

92 In addition to the challenges described above, the COVID-19 pandemic has created  
93 massive employment insecurity both globally (7) and in Bolivia (8). Studies from Latin  
94 America have shown that employment insecurity and unemployment are significant  
95 risk factors for mental distress (9-11), especially during the SARS-CoV-2 pandemic  
96 (7, 8). Likewise, formal employment as a new healthcare graduate in Mexico during  
97 the COVID-19 pandemic was found to be a protective factor against mental distress.  
98 Prior to the pandemic, students' risk of mental distress was shown to decrease as  
99 they entered their professional career (12). However, no studies were found that  
100 examined this development during the COVID-19 pandemic.

101 Forms of insecure employment include informal employment and underemployment  
102 (13). Informal employment is characterized by low skill requirements and economic  
103 barriers to entry, labor-intensive production in small family businesses, and an  
104 unregulated and competitive market (10, 13). Underemployment occurs when  
105 individuals are employed but not according to their skills, are underpaid, or work  
106 fewer hours than desired (14). Unemployment, on the other hand, occurs when  
107 individuals do not have a job that pays a regular salary (15). In Bolivia,  
108 unemployment and underemployment rates have increased during the COVID-19  
109 pandemic and have begun to decline again since the end of 2021: unemployment  
110 rates were 4% in 2019, 7% in 2021, and 4% in 2022, and underemployment rates  
111 were 4% in 2019, 10% in January 2021 and 7% in December 2021 (16). In Bolivia,  
112 weak social policies have resulted in a lack of social benefits for the unemployed and

113 underemployed, leading to high informal employment rates of 85% in 2019 and  
114 estimated 90% in 2021 (10, 17, 18). Unemployment and insecure employment  
115 particularly affect young adults who have recently graduated (7). In the healthcare  
116 sector, financial support from international organizations has helped improve access  
117 and treatment for the Bolivian population in recent decades. However, the Bolivian  
118 health sector remains underfunded, resulting in a shortage of supplies, facilities and  
119 qualified HCW (19). Young HCW, in particular, face an employment crisis associated  
120 with job insecurity, unemployment, informal employment, and underemployment  
121 characterized by low-income and low-skill work (18, 20).

122 In summary, the working conditions in the healthcare sector worsened worldwide  
123 during the COVID-19 pandemic (2). In addition to the difficult employment situation of  
124 HCW in Bolivia before the pandemic, insecure employment and unemployment  
125 increased significantly (10, 13, 16, 17), particularly among young adults (7). Both of  
126 these factors may increase mental distress (2, 9-11). The question arises as to how  
127 these conditions affect the – under normal circumstances – positive development of  
128 students' mental health as they enter professional careers. Therefore, we followed up  
129 recent HCW graduates in Sucre, Bolivia to examine how the prevalence of mental  
130 distress changed since the onset of the SARS-CoV-2 pandemic and whether  
131 employment status after graduation (i.e., formal employment vs.  
132 unemployment/insecure employment) played a role in this development.

## 133 **Materials and Methods**

### 134 *Study Design*

135 A prospective cohort study was conducted beginning in 2018. Nursing and medical  
136 students at the Universidad San Francisco Xavier de Chuquisaca (USFX) Sucre,  
137 Bolivia were recruited. Participants were in their last year of academic training before

138 the internship (third year in the career of nursing and fifth year in the career of  
139 medicine), over 18 years of age, and Spanish-speaking (21). A total of 663 out of 809  
140 invited students (82%) participated in the baseline study. Participants were followed  
141 up in 2022.

142 For the baseline study, study coordinators visited students' classes and explained the  
143 objectives and procedures of the study. Participants were given a tablet to complete  
144 the digital questionnaire on site. For the follow-up study, emails, and WhatsApp  
145 messages with a link to the questionnaire were distributed to participants who had  
146 agreed to be contacted again at baseline (n = 526, 79%). A reminder was sent after  
147 one, three, and four weeks after the initial mailing to ensure a high response rate. As  
148 an incentive, participants who completed the questionnaire received five Farmacorp  
149 (Farmacy) vouchers worth 200 Bolivianos (approx. 29 USD) each, which were  
150 distributed through a lottery. To further promote the follow-up study, it was  
151 announced on the USFX University television and radio as well as on Bolivia's public  
152 radio station 'La Bruja'. In the end, 116 (22%) participants completed the follow-up  
153 questionnaire (Figure A1).

154 The survey was pseudo-anonymous, and participants could withdraw from the study  
155 at any time without giving a reason. All participants gave written informed consent to  
156 participate in the baseline and follow-up study. The study was approved by the Ethics  
157 Committee of the Faculty of Medicine at the Universidad Mayor de San Simon (no  
158 project number assigned; November 8, 2021) and by the Ethics Committee of the  
159 Faculty of Medicine at the Ludwig-Maximilians Universität in Munich (project number  
160 22-0451; June 11, 2022).

161 *Questionnaire Instruments and Variable Definition*



162 The baseline questionnaire included 44 questions to assess the participants' socio-  
163 demographic characteristics, mental distress, lifestyle, employment status, working  
164 conditions, academic training, coping strategies, and social support. The questions  
165 were provided in Spanish and were administered as an online questionnaire using  
166 SurveyMonkey (Momentive Europe UC, Dublin, Ireland) at baseline and follow-up.  
167 Employment status and socio-demographic characteristics were assessed using  
168 parts of the Quality of Life and Employment, Labor, and Health Conditions  
169 Questionnaire of the First National Survey of Workers in Chile (ENETS) (22) and  
170 parts of the Job Prospects and Employability in Nursing and Psychology  
171 Questionnaire (23) developed in Mexico.

172 Employment status was assessed as exposure. It had to be defined differently at  
173 baseline and follow-up, as participants had not yet completed the HCW training at  
174 baseline. At baseline, employment was defined as a positive response to the  
175 question 'Are you currently working?'. At follow-up, participants were considered  
176 employed as HCW if they answered 'yes' to the two questions 'Are you currently  
177 working?' and 'Is your work related to your profession?'. If the answer to either  
178 question was 'no', the participant was considered 'unemployed or employed  
179 insecurely'. In addition, those who were formally employed at follow-up were asked if  
180 they worked with COVID-19 patients. Those who were unemployed or insecurely  
181 employed at follow-up were asked why they were not formally employed (options: 'I  
182 stopped looking for a job because I couldn't find one', 'I am currently studying or in  
183 training' or 'other reasons').

184 Socio-demographic characteristics included sex, age, marital status, economic  
185 situation, and whether participants had children. Because sex and economic situation  
186 are likely to be associated with both exposure (employment status) and outcome

187 (mental distress), they were considered as potential confounders (4, 7). Age was not  
188 included as a potential confounder because of its limited range (97% 19–30 years).

189 Mental distress was assessed using the validated Spanish version of the 12-item  
190 General Health Questionnaire (GHQ-12) (24). The GHQ-12 was originally developed  
191 in English by Goldberg and colleagues. It is a well-established self-report measure of  
192 mental distress designed to screen for psychological morbidity and psychiatric  
193 disorders in community and non-psychiatric settings. On a 4-point scale from 'much  
194 more than usual', 'rather more than usual', 'no more than usual' to 'not at all',  
195 participants indicated how often they had experienced various psychological  
196 symptoms in the past four weeks. The outcome was a binary threshold score on the  
197 GHQ-12. The threshold measure was scored using the GHQ scoring method with 0-  
198 0-1-1 for positive items and 1-1-0-0 for negative items, and summed (range 0–12)  
199 (25). As suggested by a Chilean validation study (26), participants with a GHQ-12  
200 score > 4 (threshold score 4/5) were defined as having a clinically relevant level of  
201 mental distress (hereafter referred to as 'mental distress').

## 202 *Statistical Analysis*

203 Data analysis was performed using SPSS version 28.0 (IBM, Armonk, NY, USA).

204 To assess selective losses in the follow-up study, we compared subjects who  
205 participated in both studies with those who dropped out. Differences between these  
206 two groups were examined using chi-square tests for binary variables and paired t-  
207 tests for continuous variables. To examine systematic differences between being  
208 employed as an HCW and being unemployed or insecurely employed as an HCW,  
209 we compared these groups at follow-up. Nominal and ordinal variables were  
210 described as absolute and relative frequencies. Metric variables were described as  
211 mean and standard deviation (SD). We used chi-square tests to assess the

212 association between socio-demographic characteristics and the employment status  
213 with mental distress in bivariate analysis.

214 Missing data on outcome, exposure, and potential risk factors were multiply imputed  
215 (n = 20) for participants who answered at least one question in the baseline and  
216 follow-up questionnaires. Assuming that these data were missing at random, the  
217 Fully Conditional Specification (FSC) method was used with the Predictive Mean  
218 Matching (PMM) scaling model, as implemented in SPSS software (27).

219 To analyze associations between exposure and outcome, Generalized Estimating  
220 Equations (GEE) were used to estimate odds ratios (OR) and corresponding 95%  
221 confidence intervals (95% CI) using the logit link function. Participants were used as  
222 the clustering factor. Time (T0 = baseline, T1 = follow-up) was considered as an inner  
223 subject effect. First, unadjusted results were estimated for time, exposure  
224 (employment status), and all potential risk factors. In the next step, the model was  
225 adjusted for the potential confounders sex and economic situation. Associations of  
226 change in mental distress with employment over time were analyzed by including an  
227 interaction term between time and employment status. An interaction was suspected  
228 because the employment status changed between T0 and T1 due to the participants'  
229 graduation in the meantime and the influence of the COVID-19 pandemic (7, 8, 28).

230 Several sensitivity analyses were performed. First, we used a threshold score of 5/6  
231 for the binary threshold score of the GHQ-12. Second, the continuous mean GHQ-12  
232 score was used as the outcome. For this, the GHQ-12 items were scored according  
233 to the Likert scoring method (0-1-2-3 for positive items and inverted for negative  
234 items), resulting in a score of 0–36 (29). In the GEE, the identity link function was  
235 used to analyze the continuous outcome. Third, we changed the definition of the  
236 exposure variable (employment status) at baseline. Employment was defined the

237 same as at follow-up as an affirmative response to the question, 'Is your work related  
238 to your profession?'. Fourth, those who were still in academic training at follow-up  
239 were excluded from the analysis. Finally, fully imputed data were analyzed, taking  
240 into account all those who participated at baseline.

## 241 **Results**

242 At baseline, the mean age of the 663 participants was 23.9 (SD 2.9) years. More  
243 women (68%) than men (32%) and more medical students (80%) than nursing  
244 students (20%) participated in the study.

245 There was no statistically significant difference between participants who remained in  
246 the study and those who dropped out ( $p > 0.05$  for all variables). However, while 26%  
247 of those who remained in the study were employed at baseline, only 20% of those  
248 lost to follow-up did so. The prevalence of mental distress at baseline was similar in  
249 the two groups (64% of retained versus 65% of lost to follow-up, Table 1).

250 At follow-up, 49% of the population worked as HCW in formal employment. Of the  
251 unemployed or insecurely employed HCW, 32% were currently studying or  
252 undergoing training. Overall, formally employed HCW at follow-up were more likely to  
253 be in an economically disadvantaged situation at baseline compared to those HCW  
254 being unemployed or insecurely employed at follow-up (22% vs. 17%, Table 2). It  
255 was slightly more frequent among formally employed HCW at follow-up to be single  
256 than among unemployed or insecurely employed HCW (78% vs 76%). Forty-one  
257 (80%) formally employed HCW reported having worked with COVID-19 patients.

258 Restricting the study population to those who answered the GHQ-12 questions at  
259 baseline and follow-up ( $n = 103$ ), the prevalence of mental distress increased from  
260 65% at baseline to 69% at follow-up, which was not statistically significant.

261 At baseline, being female and having a less favorable economic situation were  
262 statistically significantly associated with mental distress. These associations were not  
263 found at follow-up. Among HCW who were employed at baseline the prevalence of  
264 mental distress decreased over time (70% vs. 64%). In contrast, among HCW who  
265 were employed at follow-up, the prevalence of mental distress did not change  
266 between baseline (59%) and follow-up (59%, Table 3).

267 The GEE models included all available data on participants (N = 663 for baseline and  
268 N = 116 for follow-up). Consistent with the unadjusted results, employment at  
269 baseline was not statistically significantly associated with mental distress in the  
270 adjusted model (OR=1.29 [95% CI 0.86–1.93]). At follow-up formal employment as  
271 an HCW was not statistically significantly associated with mental distress (OR=0.93  
272 [95% CI 0.13–6.83]). After adjustment, the odds of mental distress increased  
273 statistically significantly from baseline to follow-up for unemployed or insecurely  
274 employed HCW in the adjusted model (OR=2.10 [95% CI 1.05–4.24], Table 4).

275

276 Table 1. Description of the study population stratified for non-responders and  
277 responders (N = 663).

| Characteristics            |                       | No. missing (%) | Baseline participants                           |                                             |       |
|----------------------------|-----------------------|-----------------|-------------------------------------------------|---------------------------------------------|-------|
|                            |                       |                 | N = 663                                         |                                             |       |
|                            |                       |                 | Non-Responders<br>n = 547<br>n (%) <sup>0</sup> | Responders<br>n = 116<br>n (%) <sup>0</sup> | P     |
| Sex                        | Female                | 0               | 364 (66.5)                                      | 88 (75.9)                                   | 0.062 |
| Marital status in 2018     | Single <sup>+</sup>   | 0               | 444 (81.2)                                      | 91 (78.4)                                   | 0.518 |
| Career                     | Medicine <sup>#</sup> | 0               | 447 (81.7)                                      | 86 (74.1)                                   | 0.071 |
| Economic situation in 2018 | Good                  |                 | 119 (22.3)                                      | 29 (25.4)                                   | 0.665 |
|                            | Neither good nor bad  | 15 (2.3)        | 343 (64.2)                                      | 68 (59.6)                                   |       |
|                            | Bad                   |                 | 72 (13.5)                                       | 17 (14.9)                                   |       |
| Children in 2018           | Yes                   | 0               | 95 (17.4)                                       | 18 (15.5)                                   | 0.685 |
| Employment in 2018*        | Yes                   | 2 (0.3)         | 110 (20.2)                                      | 30 (25.9)                                   | 0.210 |
| Mental distress in 2018    | Yes                   | 5 (0.8)         | 347 (64.0)                                      | 75 (64.7)                                   | 0.916 |
|                            |                       |                 | Mean (SD)                                       | Mean (SD)                                   |       |
| Age (years) in 2018        |                       | 0               | 24.0 (0.1)                                      | 23.5 (0.3)                                  | 0.085 |

Non-Responders: those who did not participate in the follow-up study; Responders: those who remained in the study throughout the two time periods; Mental distress: 12-item General Health Questionnaire threshold above 4 indicates a clinically relevant level of mental distress (range 0–12); <sup>0</sup>% of non-missing data; <sup>+</sup>Otherwise 'married or having a partner'; <sup>#</sup>Otherwise 'nursing'; \*Participants were still in academic training (medicine or nursing); SD: standard deviation; Chi-square test for binary variables, paired t-test for continuous variable); Non-imputed data.

278

279

280 Table 2. Description of the study population stratified for participants who were  
 281 unemployed/insecurely employed as HCW or were formally employed as HCW at  
 282 follow-up (N = 116).

| Characteristics            |                       | No. missing (%) Employment status at follow-up |                                           |                          |
|----------------------------|-----------------------|------------------------------------------------|-------------------------------------------|--------------------------|
|                            |                       | 12 (10.3) <sup>Δ</sup>                         | N = 116                                   |                          |
|                            |                       |                                                | Unemployed/<br>insecurely employed<br>HCW | Formally employed<br>HCW |
|                            |                       |                                                | n = 53                                    | n = 51                   |
|                            |                       |                                                | n (%) <sup>θ</sup>                        | n (%) <sup>θ</sup>       |
| Sex                        | Female                | 0                                              | 40 (75.5)                                 | 38 (74.5)                |
| Marital status in 2018     | Single <sup>+</sup>   | 0                                              | 40 (75.5)                                 | 40 (78.4)                |
| Career                     | Medicine <sup>#</sup> | 0                                              | 40 (75.5)                                 | 38 (74.5)                |
| Economic situation in 2018 | Good                  |                                                | 14 (26.9)                                 | 6 (12.0)                 |
|                            | Neither good nor bad  | 2 (1.7)                                        | 29 (55.8)                                 | 33 (66.0)                |
|                            | Bad                   |                                                | 9 (17.3)                                  | 11 (22.0)                |
| Children in 2018           | Yes                   | 0                                              | 8 (15.1)                                  | 8 (15.7)                 |
|                            |                       |                                                | Mean (SD)                                 | Mean (SD)                |
| Age (years) in 2018        |                       | 0                                              | 23.4 (0.4)                                | 23.5 (0.4)               |

HCW: Healthcare workers; <sup>θ</sup>% of non-missing data; <sup>Δ</sup>12 participants did not indicate employment status; <sup>+</sup>Otherwise 'married or having a partner'; <sup>#</sup>Otherwise 'nursing'; SD: standard deviation; Non-imputed data.

283

284

285 Table 3. Prevalence of mental distress among participants at baseline (N = 663) and  
286 follow-up (N = 116) by potential risk factors.

| Characteristics            |                                       | No. missing (%) | Mental distress at baseline |         | No. missing (%) | Mental distress at follow-up |         |
|----------------------------|---------------------------------------|-----------------|-----------------------------|---------|-----------------|------------------------------|---------|
|                            |                                       |                 | N = 663                     |         |                 | N = 116                      |         |
|                            |                                       |                 | n (%) <sup>0</sup>          | p-value |                 | n (%) <sup>0</sup>           | p-value |
| Sex                        | Male                                  | 5 (0.8)         | 115 (55.3)                  | < 0.001 | 13 (11.2)       | 15 (62.5)                    | 0.458   |
|                            | Female                                |                 | 307 (68.4)                  |         |                 | 56 (70.9)                    |         |
| Marital status in 2018     | Single                                | 5 (0.8)         | 78 (61.7)                   | 0.537   | 13 (11.2)       | 55 (69.6)                    | 0.805   |
|                            | Married/<br>couple                    |                 | 344 (64.9)                  |         |                 | 16 (66.7)                    |         |
| Career                     | Medicine                              | 5 (0.8)         | 342 (64.7)                  | 0.682   | 13 (11.2)       | 15 (57.7)                    | 0.220   |
|                            | Nursing                               |                 | 80 (62.5)                   |         |                 | 56 (72.7)                    |         |
| Economic situation in 2018 | Good                                  | 20 (3.0)        | 77 (52.7)                   | 0.004   | 15 (12.9)       | 14 (56.0)                    | 0.174   |
|                            | Neither good<br>nor bad               |                 | 276 (67.7)                  |         |                 | 43 (69.4)                    |         |
|                            | Bad                                   |                 | 60 (68.2)                   |         |                 | 12 (85.7)                    |         |
| Children in 2018           | No                                    | 5 (0.8)         | 344 (63.2)                  | 0.239   | 13 (11.2)       | 57 (65.5)                    | 0.139   |
|                            | Yes                                   |                 | 78 (69.3)                   |         |                 | 14 (87.5)                    |         |
| Employment in 2018*        | No                                    | 6 (0.9)         | 324 (62.8)                  | 0.113   | 13 (11.2)       | 53 (70.7)                    | 0.633   |
|                            | Yes                                   |                 | 98 (70.0)                   |         |                 | 18 (64.3)                    |         |
| Employment as HCW in 2022  | Unemployed/<br>insecurely<br>employed | 559<br>(84.3)   | 38 (71.7)                   | 0.217   | 14 (12.1)       | 40 (78.4)                    | 0.054   |
|                            | Formally<br>employed                  |                 | 30 (58.8)                   |         |                 | 30 (58.8)                    |         |

HCW: Healthcare workers; Mental distress: 12-item General Health Questionnaire threshold above 4 indicates a clinically relevant level of mental distress (range 0–12); p-values calculated with Chi-square test; p-values are bold if < 0.05; <sup>0</sup>% of non-missing data; \*Participants were still in academic training (medicine or nursing); Non-imputed data.

287

288



289 Table 4. Results of Generalized Estimating Equations models for mental distress with  
290 threshold score 4/5 between baseline and follow-up.

| Characteristics    |                                          | Mental distress      |                         |
|--------------------|------------------------------------------|----------------------|-------------------------|
|                    |                                          | N = 663 <sup>0</sup> |                         |
|                    |                                          | Crude OR<br>(95% CI) | Adjusted OR<br>(95% CI) |
| Sex                | Male                                     | 1                    | 1                       |
|                    | Female                                   | 1.71 (1.29–2.37)     | 1.68 (1.21–2.34)        |
| Economic situation | Good                                     | 1                    | 1                       |
|                    | Neither good nor bad                     | 1.65 (1.16–2.35)     | 1.53 (1.07–2.20)        |
|                    | Bad                                      | 2.02 (1.19–3.43)     | 1.92 (1.12–3.29)        |
| Employment         | No                                       | 1                    | 1                       |
|                    | Yes                                      | 1.12 (0.78–1.60)     | 1.29 (0.86–1.93)        |
| Study phase        | Baseline: 2018                           | 1                    | 1                       |
|                    | Follow-up: 2022                          | 1.31 (0.86–2.00)     | 2.10 (1.05–4.24)        |
| Interaction        | Not employed at baseline*                | 1                    | 1                       |
|                    | Formally employed as<br>HCW at follow-up | 0.93 (0.16–5.28)     | 0.93 (0.13–6.83)        |

HCW: Healthcare workers; Mental distress: 12-item General Health Questionnaire threshold above 4 indicates a clinically relevant level of mental distress (range 0–12); Estimates are bold if CI excludes 1; <sup>0</sup>Follow-up data available for N = 116; Adjusted for sex and economic situation; \*Participants were still in academic training (medicine or nursing); Imputed data.

291 The results of all sensitivity analyses confirmed our findings. In all GEE models,  
292 mental distress increased among unemployed and insecurely employed HCW during  
293 the COVID-19 pandemic. However, the results were no longer statistically significant.  
294 In all GEE models, mental distress did not change among formally employed HCW  
295 during the COVID-19 pandemic (Tables A1-A5).

## 296 Discussion

297 This study is the first to track employment and mental distress among HCW who  
298 were in their final year of study in 2018, just before the outbreak of the COVID-19  
299 pandemic in Bolivia. Contrary to expectations from pre-COVID-19 studies, the  
300 prevalence of mental distress among medical and nursing students (T0) and  
301 graduates (T1) did not decrease during the SARS-CoV-2 pandemic, nor did it

302 increase overall. However, we found a statistically significant increase in mental  
303 distress among unemployed and insecurely employed HCW three years into the  
304 pandemic. In contrast, among those formally employed as medical or nursing  
305 graduate, there was no statistically significant change in mental distress during the  
306 pandemic.

### 307 *Consistency with other Studies*

308 Comparing our findings with other studies of mental distress in Bolivia, we found that  
309 young HCW had a higher prevalence of mental distress than Bolivian teachers (43%)  
310 and a lower prevalence than Bolivian miners (81%) (30, 31). Given the extreme  
311 working conditions, such as very high and very low temperatures, noise, and shift  
312 work, the higher prevalence of mental distress among miners is not surprising (31).  
313 The comparatively lower prevalence of mental distress among teachers may be due  
314 to the use of a higher threshold score of 5/6 for the GHQ-12, which results in a lower  
315 estimate of mental distress (30). However, using a threshold score of 5/6 in our  
316 sensitivity analyses did not change the association between the employment status  
317 and mental distress (Table A1). The difference in prevalence could also be  
318 attributable to the impact of the COVID-19 pandemic on HCW. As pointed out by  
319 Ferreira, L.C. et al. (32), graduates faced unprecedented challenges related to the  
320 pandemic, such as changes in internships, loss of space for practice scenarios, as  
321 well as cancellation of graduation rites and ceremonies. Participants entered a highly  
322 demanding workplace and, simultaneously, a work environment with immense  
323 employment insecurity (32). These conditions can lead to a high prevalence of  
324 mental distress (7, 8, 28). Comparing our results with the COVID-19 Healthcare  
325 Workers Study (HEROES), a prospective cohort study evaluating the impact of the  
326 COVID-19 pandemic on the mental health of HCW in 26 LMIC and HIC, including

327 Bolivia (33), the mean GHQ-12 scores were higher in our study (34). This  
328 heterogeneity in results may stem from the older age of participants in the HEROES  
329 study compared with our study population, as young HCW are more likely to develop  
330 mental distress (2, 5, 6).

331 Prior to the pandemic, students were shown to be at increased risk for mental  
332 distress (35). Consequently, under normal circumstances, mental distress decreases  
333 again with the onset of the professional career (12). However, as a result of the  
334 COVID-19 pandemic, our results showed that mental distress among young HCW did  
335 not decrease with entry into formal employment but has remained at a consistently  
336 high level. Our findings are supported by several studies that found an increase in  
337 mental distress among HCW over the course of the COVID-19 pandemic (2, 36, 37).  
338 Other studies contradict these findings (38, 39). Possible reasons for these  
339 inconsistent findings include differences in the operationalization of mental distress,  
340 cultural factors, and differences in the study population with respect to age, sex and  
341 occupation.

342 Among unemployed and insecurely employed HCW the prevalence of mental  
343 distress increased after graduation during the COVID-19 pandemic. This finding is  
344 consistent with other studies (6, 7, 40): In a secondary analysis of a longitudinal  
345 population-based study it was found that unemployment and insecure employment  
346 negatively affected mental health in the general population of the United States  
347 during the SARS-CoV-2 pandemic (7). Medina Fernández, I.A. et al. conducted a  
348 cross-sectional study of the mental health of Mexican graduate students in the  
349 context of the COVID-19 pandemic. Consistent with our results, they found that those  
350 who work as HCW were less likely to experience mental distress than those who did  
351 not work as HCW during the COVID-19 pandemic (6). Likewise, another cross-

352 sectional study investigating the mental health of recent university graduates in Brazil  
353 found that graduates were less affected by mental distress when they were formally  
354 employed (40).

355 However, a study from the United Kingdom found different results: Pierce, M. et al.  
356 examined the changes in adult mental health in the general population before and  
357 one month into the COVID-19 pandemic. They found an increase in the mean GHQ-  
358 12 score in the employed population and no change in the mean GHQ-12 score in  
359 the unemployed population (4). However, it must be said that the results may not be  
360 comparable to ours for the following reasons: First, the general population was  
361 examined, not recently graduated HCW. Second, insecure employment has  
362 fundamentally different consequences in the UK (and other HICs) than in Bolivia (and  
363 other LMICs). Without a social welfare system to support the unemployed and  
364 insecurely employed, having a secure and well-paying job is essential for survival in  
365 Bolivia (10, 13). These circumstances influence the impact of the employment status  
366 on mental distress (9-11). In addition, the initial increase in mental distress one  
367 month into the pandemic found by Pierce, M. et al. may represent a spike in  
368 emotional response that stabilizes or declines as people adjust (4). The present study  
369 reported the long-term effects of the pandemic on participants' mental health status  
370 three years into the pandemic. At this advanced stage of the pandemic, HCW may  
371 have gained resilience (38, 39).

### 372 *Limitations and Strengths*

373 Although we had a large group of participants at baseline with a high response rate  
374 (82%), the response rate at follow-up was comparatively low (22%). Therefore, our  
375 results cannot be considered representative of the study population. Therefore,  
376 selection bias may be introduced. However, the non-responder analysis showed that

377 participants who were lost to follow-up were not statistically significantly different from  
378 responders who remained in the study at both time points. Nevertheless, low  
379 statistical power at follow-up may have resulted in failure to detect changes in  
380 important factors between baseline and follow-up.

381 We recognize that our exposure definition differs between baseline and follow-up  
382 because employment status varies depending on whether participants were still in  
383 training (T0) or were trained HCW (T1). This needs to be taken into account when  
384 using 'not employed at baseline' as reference group. There may also be other  
385 aspects that changed between T0 and T1, such as participants moving out of Sucre,  
386 Bolivia after graduation. However, sensitivity analysis showed that the association  
387 between employment status and mental distress did not change when employment at  
388 baseline was defined identically to employment at follow-up as employment as HCW  
389 (Table A2). Excluding participants at follow-up who stated to still being in training also  
390 did not change the association (Table A3).

391 Misclassification of exposure and outcome may have occurred because they were  
392 assessed only by questionnaire. The GHQ-12 is a validated screening tool that  
393 correlates strongly with the presence of mental illness and with future clinical  
394 diagnosis of a psychiatric disorder. However, the GHQ-12 is not equivalent to a  
395 clinical diagnosis (41). This study relied on self-report, which is valid primarily  
396 because the effect of employment status on mental distress depends largely on  
397 personal assessment of the situation. This leads us to the conclusion that the  
398 possibility of measurement error is low (42). Bias in the negatively worded items of  
399 the GHQ-12 may have occurred due to inattentive reading by responders, i.e., the  
400 respondent did not notice that the response format had changed (positive and  
401 negative items) (43).

402 This study cannot conclusively identify the reasons why economically disadvantaged  
403 participants are more likely to be formally employed than participants in an  
404 economically advantaged situation. In addition to policy reasons, explanations could  
405 be that participants with greater economic needs applied at an early stage for formal  
406 employment and did not, e.g., complete further training. Early entry into employment  
407 allowed them to develop soft- and work-related skills, which made them more  
408 attractive to the formal labor market.

409 The present study did not distinguish between the different forms of  
410 underemployment and unemployment. Underemployment can be income-, skill- or  
411 hours-based (14). Whereas unemployment can be frictional, structural, or cyclical  
412 (44). Likewise, we combined unemployed and insecurely employed HCW into one  
413 group because there is evidence that insecurely employed people mirror unemployed  
414 people in terms of their mental health (7). We also did not distinguish between  
415 frontline HCW, which are HCW providing direct care for COVID-19 patients, and  
416 normal HCW, although there is indication that the prevalence may be higher among  
417 frontline HCW (45). Consequently, a dose-response relationship could not be  
418 assessed.

419 Due to the prospective design of the study the risk of recall bias was limited because  
420 the temporal sequence of exposure and outcome could be evaluated. Nevertheless,  
421 the possibility of reverse causation cannot be excluded. For example, childhood  
422 mental health problems could not be included as a potential confounder because  
423 such information was not available. Potential confounding by sex and economic  
424 situation was taken into account, although we did not consider aspects such as the  
425 impact of measures such as home-schooling, other occupations, such as caring for  
426 relatives, whether participants had been diagnosed with COVID-19 or other serious

427 and/or chronic diseases, and whether participants had been vaccinated against the  
428 SARS-CoV-2 virus (7).

## 429 **Conclusion**

430 Our study describes an increase in mental distress among unemployed and  
431 insecurely employed HCW after graduation during the SARS-CoV-2 pandemic, while  
432 no change was observed among those who were formally employed. Particularly in  
433 countries with a labor market dominated by informal employment, underemployment,  
434 and unemployment with limited social support for citizens, such as Bolivia, it may be  
435 useful to consider these findings. Interventions and a change in policy strategies are  
436 needed to prevent mental distress among young HCW, especially in the face of  
437 crises such as the COVID-19 pandemic.

438

## 439 **References**

- 440 1. World Health Organisation. COVID-19 2023 [27.01.2023]. Available from:  
441 <https://covid19.who.int/>.
- 442 2. Rosales Vaca KM, Cruz Barrientos OI, Giron Lopez S, Noriega S, More Arias  
443 A, Guariente SMM, et al. Mental health of healthcare workers of Latin American  
444 countries: a review of studies published during the first year of COVID-19 pandemic.  
445 *Psychiatry Res.* 2022;311.
- 446 3. McGinty EE, Presskreischer R, Han H, Barry CL. Psychological Distress and  
447 Loneliness Reported by US Adults in 2018 and April 2020. *JAMA.* 2020;324(1):93-4.
- 448 4. Pierce M, Hope H, Ford T, Hatch S, Hotopf M, John A, et al. Mental health  
449 before and during the COVID-19 pandemic: a longitudinal probability sample survey  
450 of the UK population. *Lancet Psychiatry.* 2020;7(10):883-92.
- 451 5. Giardino DL, Huck-Iriart C, Riddick M, Garay A. The endless quarantine: the  
452 impact of the COVID-19 outbreak on healthcare workers after three months of  
453 mandatory social isolation in Argentina. *Sleep Med.* 2020;76:16-25.
- 454 6. Medina Fernández IA, Carreño Moreno S, Chaparro Díaz L, Gallegos-Torres  
455 RM, Medina Fernández JA, Hernández Martínez EK. Fear, Stress, and Knowledge  
456 regarding COVID-19 in Nursing Students and Recent Graduates in Mexico. *Invest*  
457 *Educ Enferm.* 2021;39(1).
- 458 7. Lee JO, Kapteyn A, Clomax A, Jin H. Estimating influences of unemployment  
459 and underemployment on mental health during the COVID-19 pandemic: who suffers  
460 the most? *Public Health.* 2021;201:48-54.
- 461 8. Beatriz M. How is COVID-19 affecting employment in Bolivia? : Institute for  
462 Advanced Development Studies; 2020 [Available from:



- 463 <https://www.inesad.edu.bo/en/2020/07/09/como-esta-afectando-el-covid-19-al->  
464 [empleo-en-bolivia/](https://www.inesad.edu.bo/en/2020/07/09/como-esta-afectando-el-covid-19-al-).
- 465 9. Lopez-Ruiz M, Benavides G, Vives A, Artazcoz L. Informal employment,  
466 unpaid care work, and health status in Spanish-speaking Central American countries:  
467 a gender-based approach. *Int J Public Health*. 2017;62(2):209-18.
- 468 10. Utzet M, Botías F, Silva-Peñaherrera M, Tobías A, Benavides FG. Informal  
469 employment and poor self-perceived health in Latin America and the Caribbean: a  
470 gender-based comparison between countries and welfare states in a pooled analysis  
471 of 176,786 workers. *Global Health*. 2021;17(1):1-11.
- 472 11. Silva-Peñaherrera M, López-Ruiz M, Merino-Salazar P, Gomez Garcia AR,  
473 Benavides FG. Association between informal employment and mortality rate by  
474 welfare regime in Latin America and the Caribbean: an ecological study. *BMJ Open*.  
475 2021;11(8).
- 476 12. Stallman HM. Psychological distress in university students: A comparison with  
477 general population data. *Aust Psychol*. 2010;45(4):249-57.
- 478 13. García-Ubaque JC, Riaño-Casallas MI, Benavides-Piracón JA. Informal  
479 employment, unemployment and underemployment: a matter of public health  
480 [Spanish: Informalidad, desempleo y subempleo: Un problema de salud pública]. *Rev*  
481 *Salud Pública*. 2012;14:138-50.
- 482 14. Crowe L, Butterworth P, Leach L. Financial hardship, mastery and social  
483 support: explaining poor mental health amongst the inadequately employed using  
484 data from the HILDA survey. *SSM Popul Health*. 2016;2:407-15.
- 485 15. Cambridge Dictionary. Unemployment. [21.12.2022]. Available from:  
486 <https://dictionary.cambridge.org/dictionary/english/unemployment>.

- 487 16. National Institute of Statistics [Spanish: Instituto Nacional de Estadística].  
488 Encuesta de Hogares 2021 2021 [Available from:  
489 <http://anda.ine.gob.bo/index.php/catalog/84>.
- 490 17. Jáuregui ER. Telework and Workers' Rights in Bolivia [Spanish: Teletrabajo y  
491 derechos laborales en Bolivia]: Friedrich Ebert Stiftung; 2021 [Available from:  
492 <https://library.fes.de/pdf-files/bueros/uruguay/19508.pdf>.
- 493 18. Centre for Latin American Research and Documentation. What about our  
494 rights for workers in Bolivia? [Spanish: Alerta Laboral 90: Y nuestros derechos  
495 Situación de los trabajadores en Bolivia?]. 2022.
- 496 19. Blain M. Cross-Continental Care: US and Cuban Medical Internationalism in  
497 Bolivia. Minneapolis, Minnesota, US: Macalester College; 2015.
- 498 20. Centre for Latin American Research and Documentation. Young people and  
499 work in the municipality of La Paz. Gaps and challenges [Spanish: Boletín OBESS:  
500 Jóvenes y trabajo en el municipio de La Paz. Brechas y desafíos]. 2016.
- 501 21. Solís-Soto MT, Martínez Pérez S, Esther Santos M, Muehlhaeusser M, Radon  
502 K. Relationship between work and self-perceived health among nursing students in  
503 Sucre, Bolivia [Spanish: Relación de trabajo y autopercepción de salud en  
504 estudiantes de Enfermería en Sucre, Bolivia]. Educación Médica Superior.  
505 2019;33(3).
- 506 22. Solar O, Bernales P, Sembler C, Vallebuona C. First National Employment,  
507 Labour and Health Survey ENETS 2009: Conceptual and Methodological Design  
508 [Spanish: Primera Encuesta Nacional de Empleo, Trabajo y Salud ENETS 2009:  
509 Diseño Conceptual y Metodológico]. Santiago, Chile: Ministerio de Salud/Dirección  
510 del Trabajo/Instituto de Seguridad Laboral; 2010.

- 511 23. Paz F, Betanzos N, Uribe-Barrera N. Job prospects and employability in  
512 nursing and psychology [Spanish: Expectativas laborales y empleabilidad en  
513 enfermería y psicología]. *Aquichán*. 2014;14:67-78.
- 514 24. Sánchez-López MP, Dresch V. The 12-Item General Health Questionnaire  
515 (GHQ-12): reliability, external validity and factor structure in the Spanish population.  
516 *Psicothema*. 2008;20:839-43.
- 517 25. Goldberg DP, Williams P. A user's guide to the General Health Questionnaire.  
518 1st ed. London, United Kingdom: nferNelson; 1988.
- 519 26. Araya R, Wynn R, Lewis G. Comparison of two self administered psychiatric  
520 questionnaires (GHQ-12 and SRQ-20) in primary care in Chile. *Soc Psychiatry*  
521 *Psychiatr Epidemiol*. 1992;27(4):168-73.
- 522 27. IBM Corporation. Multiple Imputation [Available from:  
523 <https://www.ibm.com/docs/en/spss-statistics/27.0.0?topic=values-multiple-imputation>.
- 524 28. Xiong J, Lipsitz O, Nasri F, Lui LMW, Gill H, Phan L, et al. Impact of COVID-19  
525 pandemic on mental health in the general population: A systematic review. *J Affect*  
526 *Disord*. 2020;277:55-64.
- 527 29. Lesage F-X, Martens-Resende S, Deschamps F, Berjot S. Validation of the  
528 General Health Questionnaire (GHQ-12) adapted to a work-related context. *Open J*  
529 *Prev Med*. 2011;1(2):44-8.
- 530 30. Solis-Soto MT, Schon A, Parra M, Radon K. Associations between effort-  
531 reward imbalance and health indicators among school teachers in Chuquisaca,  
532 Bolivia: a cross-sectional study. *BMJ Open*. 2019;9(3).
- 533 31. Salas ML, Quezada S, Basagoitia A, Fernandez T, Herrera R, Parra M, et al.  
534 Working Conditions, Workplace Violence, and Psychological Distress in Andean

- 535 Miners: A Cross-sectional Study Across Three Countries. *Ann Glob Health*.  
536 2015;81(4):465-74.
- 537 32. Ferreira LC, Amorim RS, Melo Campos FM, Cipolotti R. Mental health and  
538 illness of medical students and newly graduated doctors during the pandemic of  
539 SARS-Cov-2/COVID-19. *PLoS One*. 2021;16(5).
- 540 33. Mascayano F, van der Ven E, Moro MF, Schilling S, Alarcón S, Al Barathie J,  
541 et al. The impact of the COVID-19 pandemic on the mental health of healthcare  
542 workers: study protocol for the COVID-19 HEalth caRe wOrkErS (HEROES) study.  
543 *Soc Psychiatry Psychiatr Epidemiol*. 2022;57(3):633-45.
- 544 34. Pan American Health Organization [Spanish: Organización Panamericana de  
545 la Salud]. The COVID-19 HEalth caRe wOrkErS Study (HEROES). Informe Regional  
546 de las Américas. 2022.
- 547 35. Pacheco JP, Giacomini HT, Tam WW, Ribeiro TB, Arab C, Bezerra IM, et al.  
548 Mental health problems among medical students in Brazil: a systematic review and  
549 meta-analysis. *Rev Bras Psiquiatr*. 2017;39:369-78.
- 550 36. López-Steinmetz LC, Herrera CR, Fong SB, Godoy JC. Changes in  
551 Healthcare Workers' Anxiety During Two Time Points of the COVID-19 Pandemic:  
552 Evidence From a Longitudinal Study. *Int J Ment Health Addict*. 2021:1-15.
- 553 37. Rodante DE, Bellotti MS. The Psychological Impact of the COVID-19  
554 Pandemic on Health Professionals from Buenos Aires. *Acta Psiquiatr Psicol Am Lat*.  
555 2020;66:207-19.
- 556 38. Olivares-Tirado P, Zanga-Pizarro R. Impact of COVID-19 pandemic outbreak  
557 on mental health of the hospital front-line healthcare workers in Chile: a difference-in-  
558 differences approach. *J Public Health (Oxf)*. 2022

- 559 39. Sampaio F, Sequeira C, Teixeira L. Impact of COVID-19 outbreak on nurses'  
560 mental health: A prospective cohort study. *Environ Res.* 2021;194:110620.
- 561 40. Scorsolini-Comin F, Patias ND, Cozzer AJ, Flores PAW, Hohendorff JV.  
562 Mental health and coping strategies in graduate students in the COVID-19 pandemic.  
563 *Rev Lat Am Enfermagem.* 2021;29.
- 564 41. Lewis G, Araya RI. Is the General Health Questionnaire (12 item) a culturally  
565 biased measure of psychiatric disorder? *Soc Psychiatry Psychiatr Epidemiol.*  
566 1995;30:20-5.
- 567 42. Baker M, Stabile M, Deri C. What do self-reported, objective, measures of  
568 health measure? *J Hum Resour.* 2004;39(4):1067-93.
- 569 43. Hankins M. The reliability of the twelve-item general health questionnaire  
570 (GHQ-12) under realistic assumptions. *BMC Public Health.* 2008;8:355.
- 571 44. Wolla SA. Making Sense of Unemployment Data 2016 [31.12.2022]. Available  
572 from: [https://research.stlouisfed.org/publications/page1-econ/2016/02/01/making-](https://research.stlouisfed.org/publications/page1-econ/2016/02/01/making-sense-of-unemployment-data/?&utm_source=fred.stlouisfed.org&utm_medium=referral&utm_term=related_re)  
573 [sense-of-unemployment-](https://research.stlouisfed.org/publications/page1-econ/2016/02/01/making-sense-of-unemployment-data/?&utm_source=fred.stlouisfed.org&utm_medium=referral&utm_term=related_re)  
574 [data/?&utm\\_source=fred.stlouisfed.org&utm\\_medium=referral&utm\\_term=related\\_re](https://research.stlouisfed.org/publications/page1-econ/2016/02/01/making-sense-of-unemployment-data/?&utm_source=fred.stlouisfed.org&utm_medium=referral&utm_term=related_re)  
575 [sources&utm\\_content=&utm\\_campaign=pageone.](https://research.stlouisfed.org/publications/page1-econ/2016/02/01/making-sense-of-unemployment-data/?&utm_source=fred.stlouisfed.org&utm_medium=referral&utm_term=related_re)
- 576 45. Zhang SX, Batra K, Xu W, Liu T, Dong RK, Yin A, et al. Mental disorder  
577 symptoms during the COVID-19 pandemic in Latin America - a systematic review and  
578 meta-analysis. *Epidemiol Psychiatr Sci.* 2022;31.
- 579

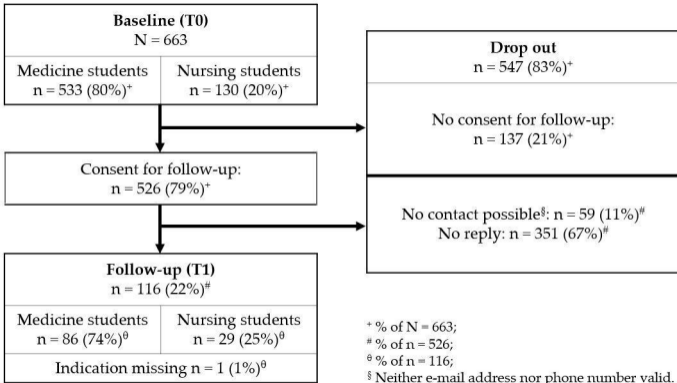

Source: https://medrxiv.org/content/10.1101/2023.08.07.23293747.full.pdf
