# Supplementary material for: Young Healthcare Workers’ Employment Status and Mental Distress over SARS-CoV-2 in Bolivia
Source: bioRxiv or medRxiv preprint supplement (doi:10.1101/2023.08.07.23293747), 2023-08-09
Supplement: Supplementary file [file media-1.pdf]

1 **SUPPLEMENTARY**

2 **Young Healthcare Workers' Employment Status and Mental Distress over**

3 **SARS-CoV-2 in Bolivia**

4 Table A1. Sensitivity analysis: Results of Generalized Estimating Equations models  
 5 for mental distress with threshold score 5/6 between baseline and follow-up.

| Characteristics    |                                       | Mental distress      |                         |
|--------------------|---------------------------------------|----------------------|-------------------------|
|                    |                                       | N = 663 <sup>0</sup> |                         |
|                    |                                       | Crude OR<br>(95% CI) | Adjusted OR<br>(95% CI) |
| Sex                | Male                                  | 1                    | 1                       |
|                    | Female                                | 1.13 (1.04–1.22)     | 1.62 (1.17–2.24)        |
| Economic situation | Good                                  | 1                    | 1                       |
|                    | Neither good nor bad                  | 1.05 (0.96–1.15)     | 1.15 (0.80–1.65)        |
|                    | Bad                                   | 1.17 (1.04–1.32)     | 1.85 (1.10–3.09)        |
| Employment         | No                                    | 1                    | 1                       |
|                    | Yes                                   | 1.02 (0.72–1.44)     | 1.10 (0.75–1.62)        |
| Study phase        | Baseline: 2018                        | 1                    | 1                       |
|                    | Follow-up: 2022                       | 1.31 (0.88–1.96)     | 1.70 (0.93–3.14)        |
| Interaction        | Not employed at baseline*             | 1                    | 1                       |
|                    | Formally employed as HCW at follow-up | 1.05 (0.11–9.78)     | 1.03 (0.15–6.86)        |

HCW: Healthcare workers; Mental distress: 12-item General Health Questionnaire threshold above 5 indicates a clinically relevant level of mental distress (range 0–12); Estimates are bold if CI excludes 1; <sup>0</sup>Follow-up data available for N = 116; Adjusted for sex and economic situation; \*Participants were still in academic training (medicine or nursing); Imputed data.

8 Table A2. Sensitivity analysis: Results of Generalized Estimating Equations models  
 9 for mental distress with threshold score 4/5 between baseline and follow-up with  
 10 identical exposure definition at both time points.

| Characteristics    |                                             | Mental distress      |                         |
|--------------------|---------------------------------------------|----------------------|-------------------------|
|                    |                                             | N = 663 <sup>0</sup> |                         |
|                    |                                             | Crude OR<br>(95% CI) | Adjusted OR<br>(95% CI) |
| Sex                | Male                                        | 1                    | 1                       |
|                    | Female                                      | 1.36 (0.56–3.31)     | 1.34 (0.62–2.89)        |
| Economic situation | Good                                        | 1                    | 1                       |
|                    | Neither good nor bad                        | 1.44 (0.90–2.10)     | 1.39 (0.96–2.01)        |
|                    | Bad                                         | 1.83 (0.91–3.69)     | 1.79 (0.92–3.42)        |
| Employment         | No                                          | 1                    | 1                       |
|                    | Yes                                         | 0.89 (0.32–2.47)     | 1.01 (0.46–2.20)        |
| Study phase        | Baseline: 2018                              | 1                    | 1                       |
|                    | Follow-up: 2022                             | 1.75 (0.73–4.17)     | 2.06 (0.66–6.46)        |
| Interaction        | Unemployed/insecurely employed at baseline* | 1                    | 1                       |
|                    | Formally employed as HCW at follow-up       | 1.65 (0.20–13.52)    | 1.79 (0.14–22.42)       |

HCW: Healthcare workers; Mental distress: 12-item General Health Questionnaire threshold above 4 indicates a clinically relevant level of mental distress (range 0–12); Estimates are bold if CI excludes 1; <sup>0</sup>Follow-up data available for N = 116; Adjusted for sex and economic situation; \*Employment was defined the same as at follow-up as an affirmative response to the question 'Is your work related to your profession?'; Imputed data.

11

12

13 Table A3. Sensitivity analysis: Results of Generalized Estimating Equations models  
 14 for mental distress with threshold score 4/5 between baseline and follow-up,  
 15 excluding those studying or being in training at follow-up.

| Characteristics    |                                          | Mental distress      |                         |
|--------------------|------------------------------------------|----------------------|-------------------------|
|                    |                                          | N = 663 <sup>0</sup> |                         |
|                    |                                          | Crude OR<br>(95% CI) | Adjusted OR<br>(95% CI) |
| Sex                | Male                                     | 1                    | 1                       |
|                    | Female                                   | 1.71 (1.23–2.38)     | 1.67 (1.20–2.33)        |
| Economic situation | Good                                     | 1                    | 1                       |
|                    | Neither good nor bad                     | 1.71 (1.19–2.45)     | 1.58 (1.09–2.28)        |
|                    | Bad                                      | 2.07 (1.21–3.54)     | 1.94 (1.12–3.35)        |
| Employment         | No                                       | 1                    | 1                       |
|                    | Yes                                      | 1.09 (0.76–1.57)     | 1.29 (0.86–1.94)        |
| Study phase        | Baseline: 2018                           | 1                    | 1                       |
|                    | Follow-up: 2022                          | 1.38 (0.87–2.21)     | 3.37 (1.20–9.46)        |
| Interaction        | Not employed at baseline*                | 1                    | 1                       |
|                    | Formally employed as<br>HCW at follow-up | 0.91 (0.12–7.03)     | 0.91 (0.09–8.76)        |

HCW: Healthcare workers; Mental distress: 12-item General Health Questionnaire threshold above 4 indicates a clinically relevant level of mental distress (range 0–12); Estimates are bold if CI excludes 1; <sup>0</sup>Follow-up data available for N = 100 (excluding n = 16, who were studying or being in training at follow-up); Adjusted for sex and economic situation; \*Participants were still in academic training (medicine or nursing); Imputed data.

18 Table A4. Sensitivity analysis: Results of Generalized Estimating Equations models  
 19 for mental distress with mean GHQ-12 score between baseline and follow-up.

| Characteristics    |                                          | Mental distress      |                         |
|--------------------|------------------------------------------|----------------------|-------------------------|
|                    |                                          | N = 663 <sup>0</sup> |                         |
|                    |                                          | Crude OR<br>(95% CI) | Adjusted OR<br>(95% CI) |
| Sex                | Male                                     | 0                    | 0                       |
|                    | Female                                   | 1.78 (0.79–2.76)     | 1.76 (0.79–2.72)        |
| Economic situation | Good                                     | 0                    | 0                       |
|                    | Neither good nor bad                     | 0.99 (-0.13–2.12)    | 0.82 (-0.30–1.94)       |
|                    | Bad                                      | 2.63 (1.09–4.17)     | 2.56 (1.02–4.10)        |
| Employment         | No                                       | 0                    | 0                       |
|                    | Yes                                      | -0.17 (-1.19–0.86)   | 0.09 (-1.02–1.20)       |
| Study phase        | Baseline: 2018                           | 0                    | 0                       |
|                    | Follow-up: 2022                          | 1.07 (-0.75–2.21)    | 2.04 (0.48–3.61)        |
| Interaction        | Not employed at baseline*                | 0                    | 0                       |
|                    | Formally employed as<br>HCW at follow-up | 0.11 (-2.56–2.80)    | -0.04 (-3.18–3.10)      |

HCW: Healthcare workers; Mental distress: Higher scores of the mean 12-item General Health Questionnaire score (range 0–36) representing a higher level of mental distress; Estimates are bold if CI excludes 0; <sup>0</sup>Follow-up data available for N = 116; Adjusted for sex and economic situation; \*Participants were still in academic training (medicine or nursing); Imputed data.

22 Table A5. Sensitivity analysis: Results of Generalized Estimating Equations models  
 23 for mental distress with threshold score 4/5 between baseline and follow-up with full  
 24 data imputation.

| Characteristics    |                                          | Mental distress      |                         |
|--------------------|------------------------------------------|----------------------|-------------------------|
|                    |                                          | N = 663 <sup>o</sup> |                         |
|                    |                                          | Crude OR<br>(95% CI) | Adjusted OR<br>(95% CI) |
| Sex                | Male                                     | 1                    | 1                       |
|                    | Female                                   | 1.43 (0.58–3.56)     | 1.43 (0.61–3.33)        |
| Economic situation | Good                                     | 1                    | 1                       |
|                    | Neither good nor bad                     | 1.34 (0.82–2.19)     | 1.27 (0.80–2.03)        |
|                    | Bad                                      | 1.54 (0.67–3.58)     | 1.47 (0.67–3.25)        |
| Employment         | No                                       | 1                    | 1                       |
|                    | Yes                                      | 1.08 (0.66–1.78)     | 1.33 (0.88–2.02)        |
| Study phase        | Baseline: 2018                           | 1                    | 1                       |
|                    | Follow-up: 2022                          | 1.81 (0.73–4.50)     | 2.22 (0.77–6.43)        |
| Interaction        | Not employed at baseline*                | 1                    | 1                       |
|                    | Formally employed as<br>HCW at follow-up | 1.70 (0.24–11.82)    | 1.78 (0.21–15.18)       |

HCW: Healthcare workers; Mental distress: 12-item General Health Questionnaire threshold above 4 indicates a clinically relevant level of mental distress (range 0–12); <sup>o</sup>Complete data available for baseline and follow-up; Adjusted for sex and economic situation; \*Participants were still in academic training (medicine or nursing); Imputed data.
